# Supplementary material for: Taxonomic Revision of Eastern Part of Western Palaearctic Cordulegaster Using Molecular Phylogeny and Morphology, with the Description of Two New Species (Odonata: Anisoptera: Cordulegastridae)
Source: MDPI journal article supplement (doi:10.3390/d13120667), 2021-12-15
Supplement: s1 [file s1]

**Figure S1.** Detailed informations about the *Cordulegaster* specimens investigated in this study. All specimens are listed with locality, typus, neo-typus, re-description, paratypus, DNA isolation, deposit numbers from gene bank and source.
