# Supplementary material for: Taxonomic Revision of Eastern Part of Western Palaearctic Cordulegaster Using Molecular Phylogeny and Morphology, with the Description of Two New Species (Odonata: Anisoptera: Cordulegastridae)
Source: MDPI journal article supplement (doi:10.3390/d13120667), 2021-12-15
Supplement: s1 [file s1]

Archive with 7 entries (7 files):
- Figure S1.pdf
- Figure S2-CordWPalaearctis-COI-overview.pdf
- Figure S3_COI_StarBEAST_.jpg
- Figure S4_StarBEAST_COI_and_SPACER.jpg
- Figure S5_COI_BPP.pdf
- Figure S6_COI_SPACER_BPP.pdf
- Figure S7_COI_timetree.jpg
