# Supplementary figures and images for: Taxonomic Revision of Eastern Part of Western Palaearctic Cordulegaster Using Molecular Phylogeny and Morphology, with the Description of Two New Species (Odonata: Anisoptera: Cordulegastridae)
Source: MDPI journal article supplement (doi:10.3390/d13120667), 2021-12-15

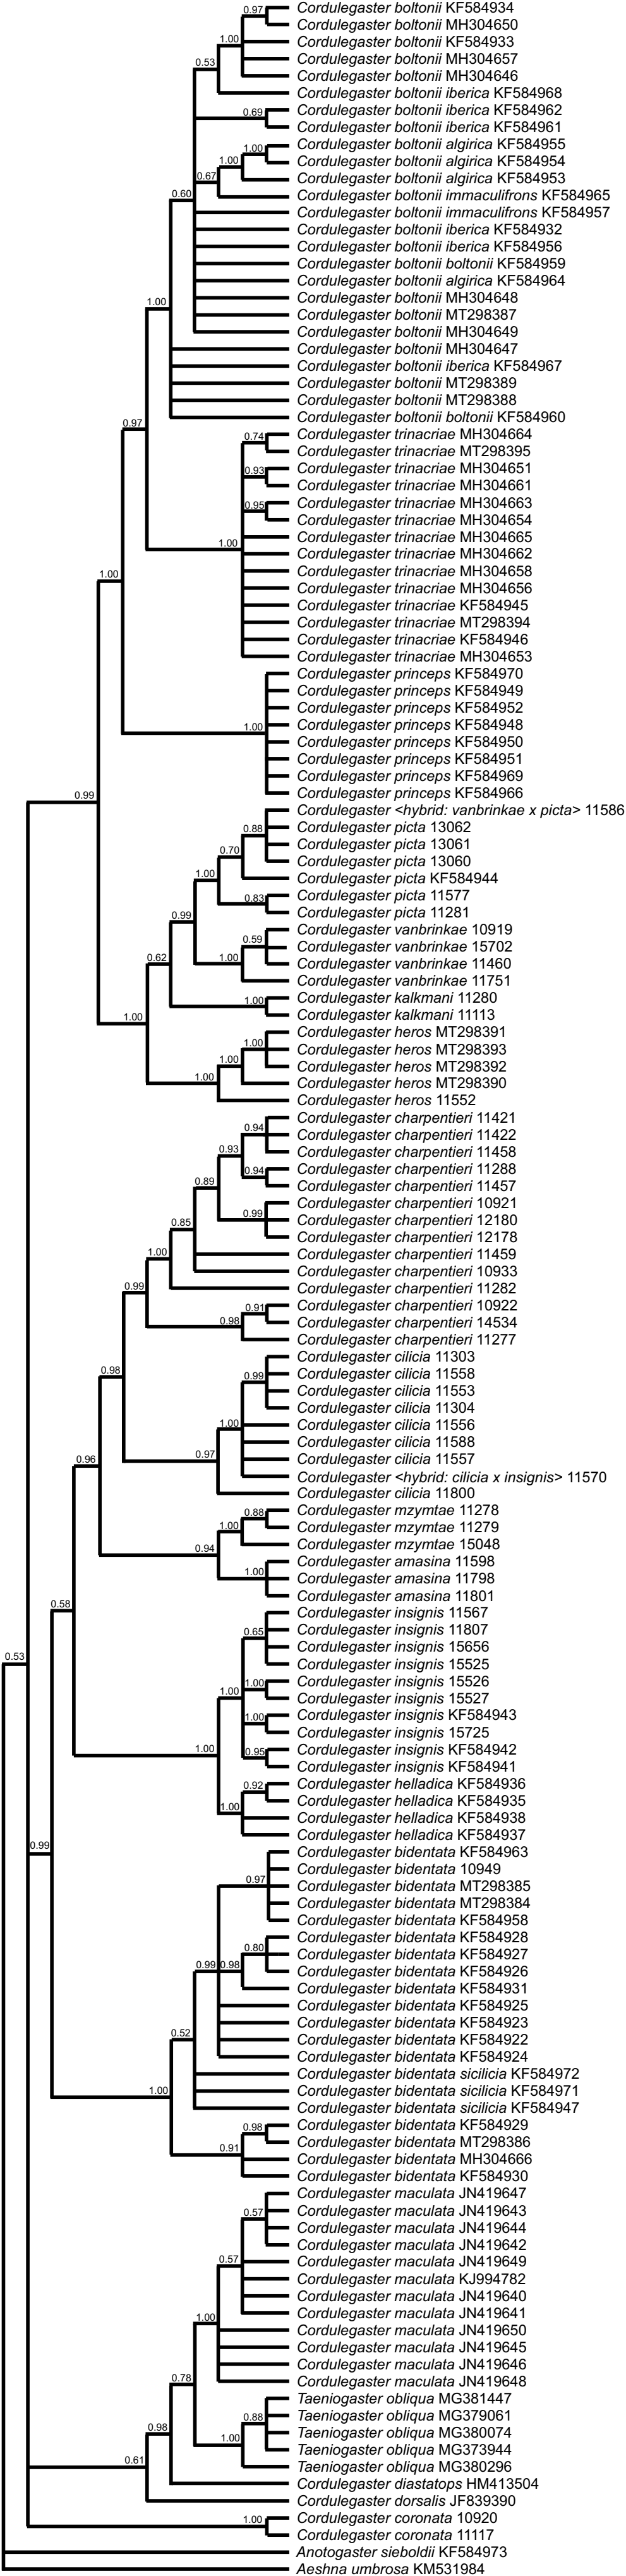

Supplement: s1 [file s1]

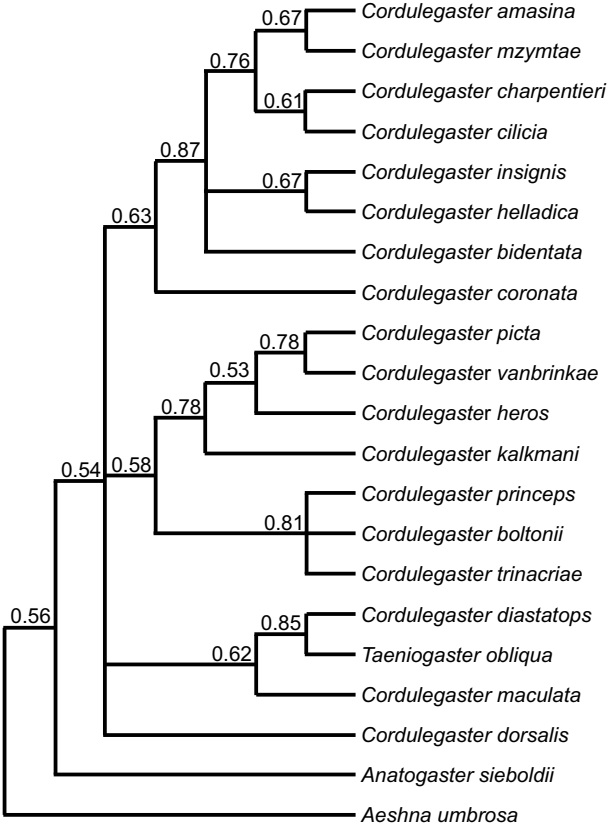

Supplement: s1 [file s1]

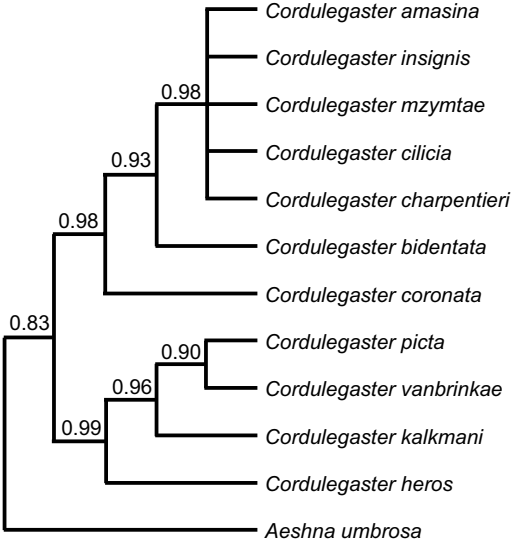

Supplement: s1 [file s1]

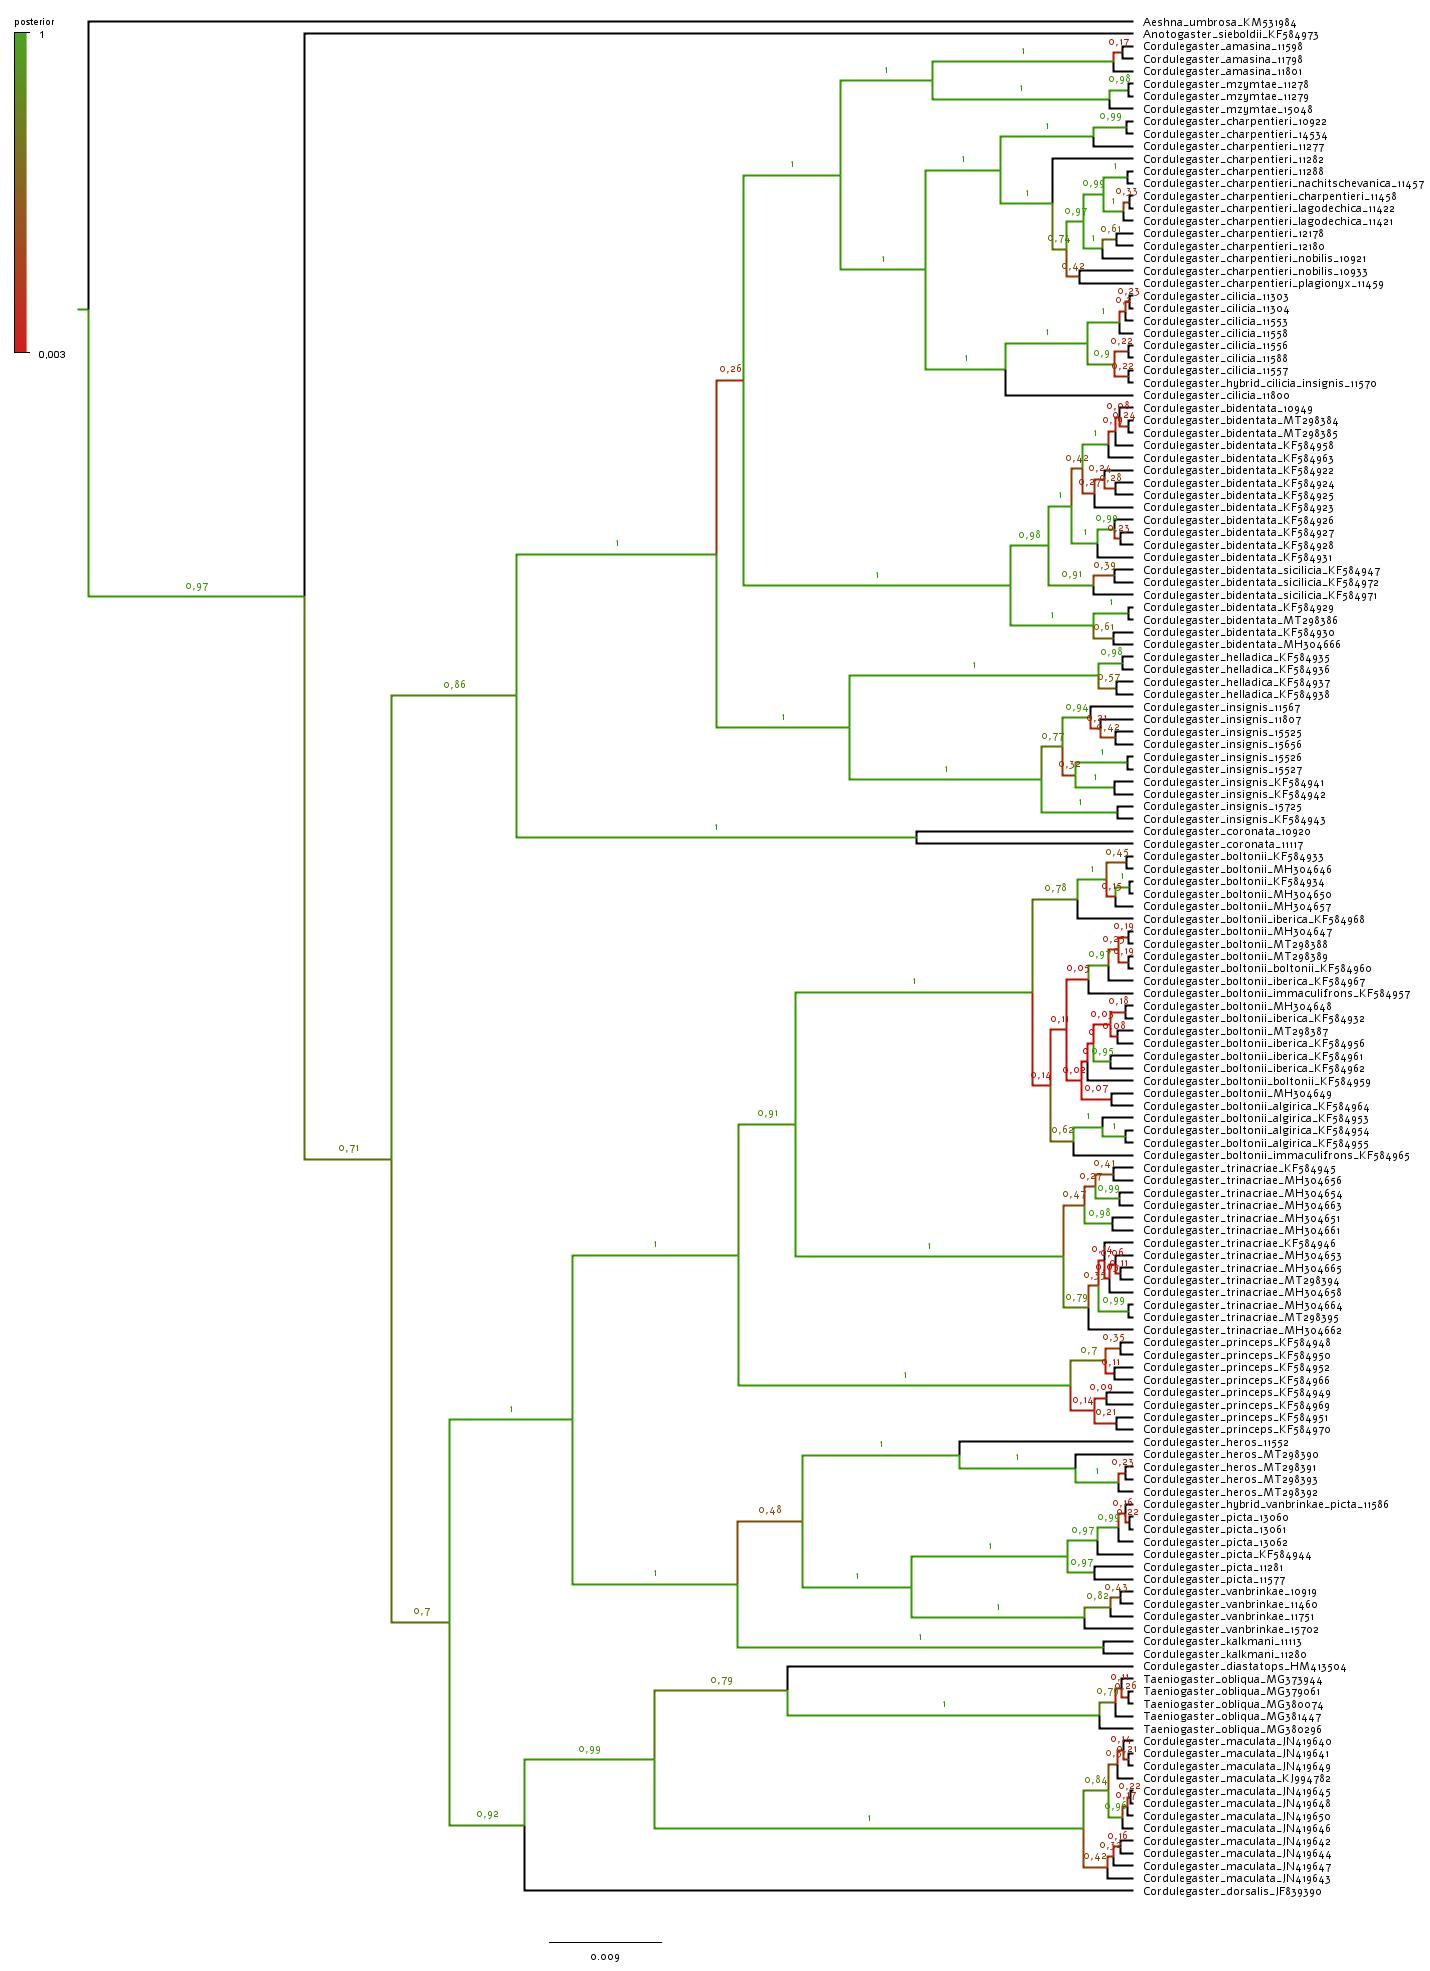

Supplement: s1 [file s1 › Figure S3_COI_StarBEAST_.jpg]

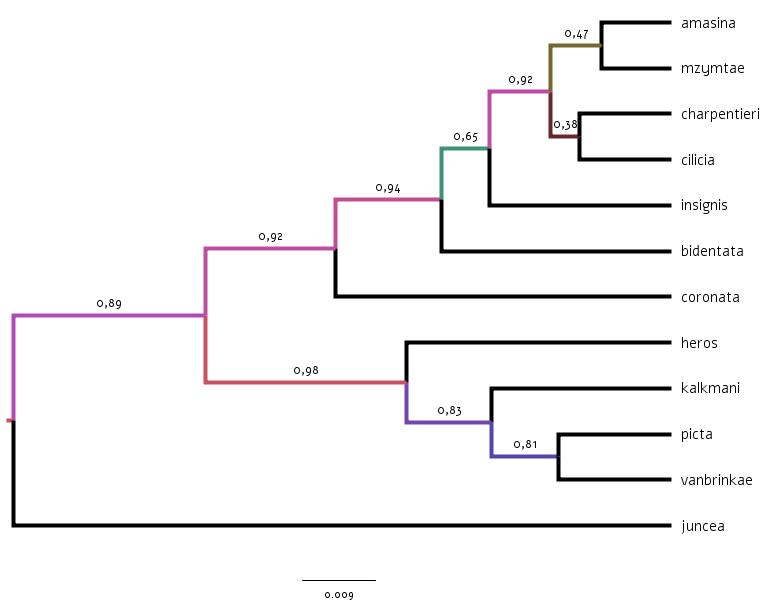

Supplement: s1 [file s1 › Figure S4_StarBEAST_COI_and_SPACER.jpg]

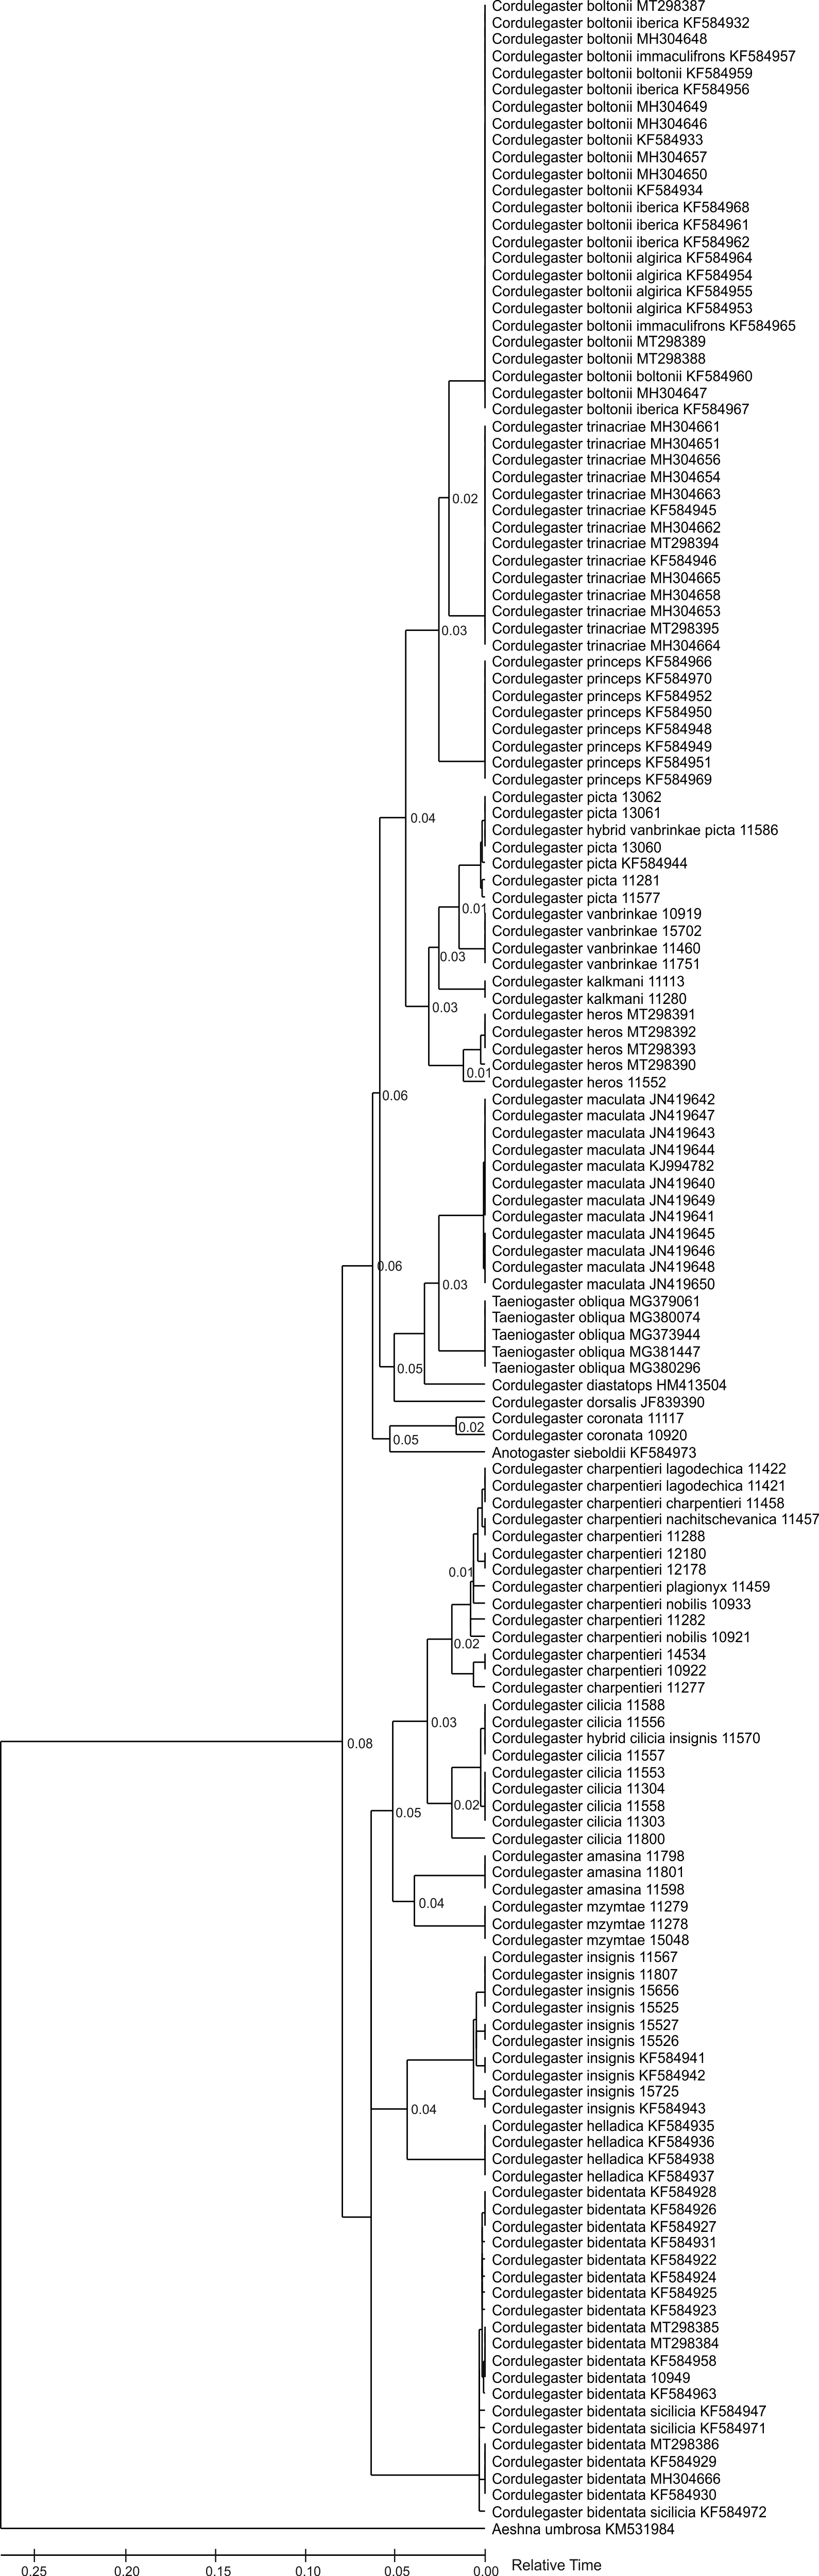

Supplement: s1 [file s1 › Figure S7_COI_timetree.jpg]
